# Supplementary material
Source: PubMed Central journal article supplement (PMC4607763)
Supplement: mmc4.pdf [file mmc4.pdf]

UC-affected human colon tissue

UC-unaffected human colon tissue

UC-affected human colon tissue

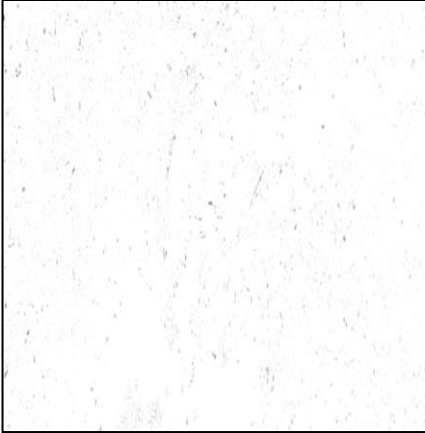

Non-immune IgG

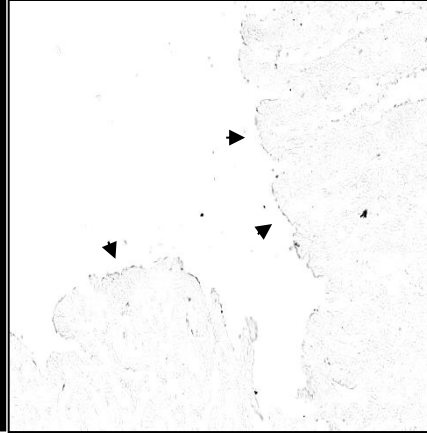

$\alpha$ -CFTR

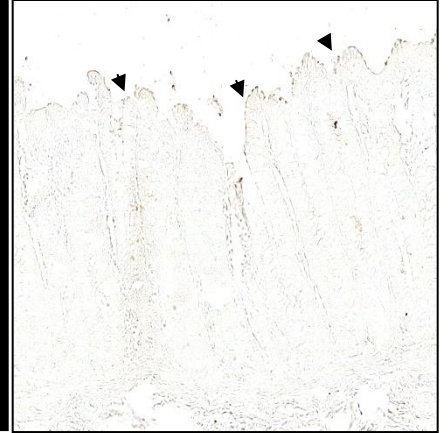

$\alpha$ -CFTR
