# Supplementary material
Source: PubMed Central journal article supplement (PMC4607763)

**A**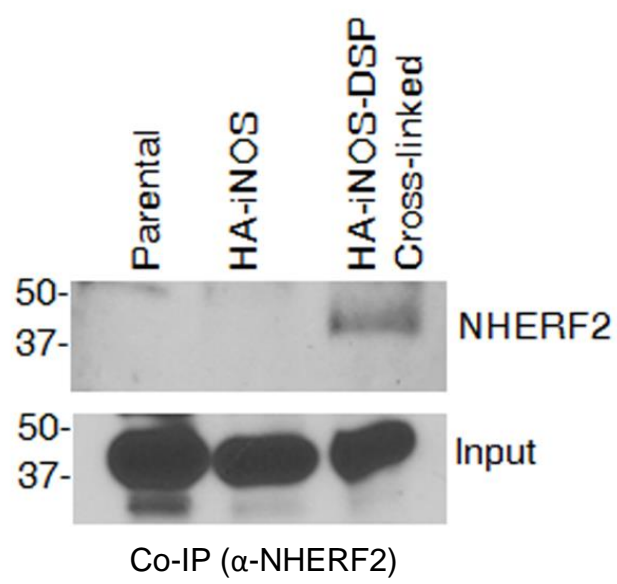**B**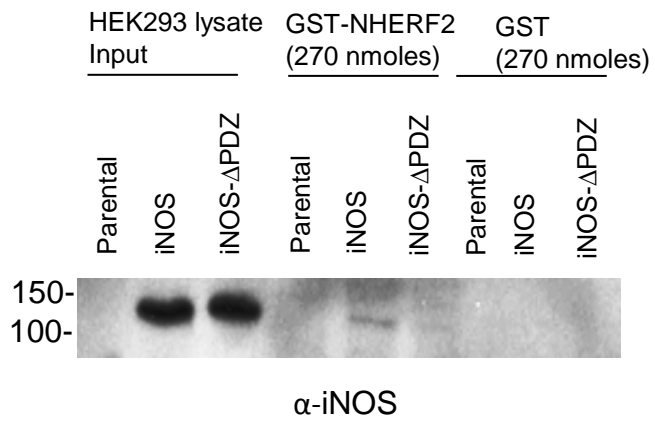

Supplement: mmc1.pdf [file mmc1.pdf]

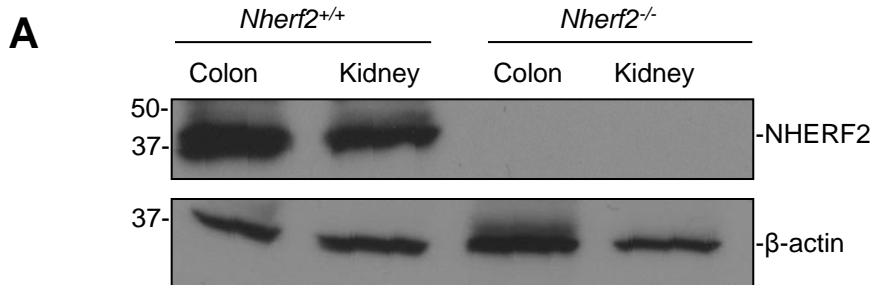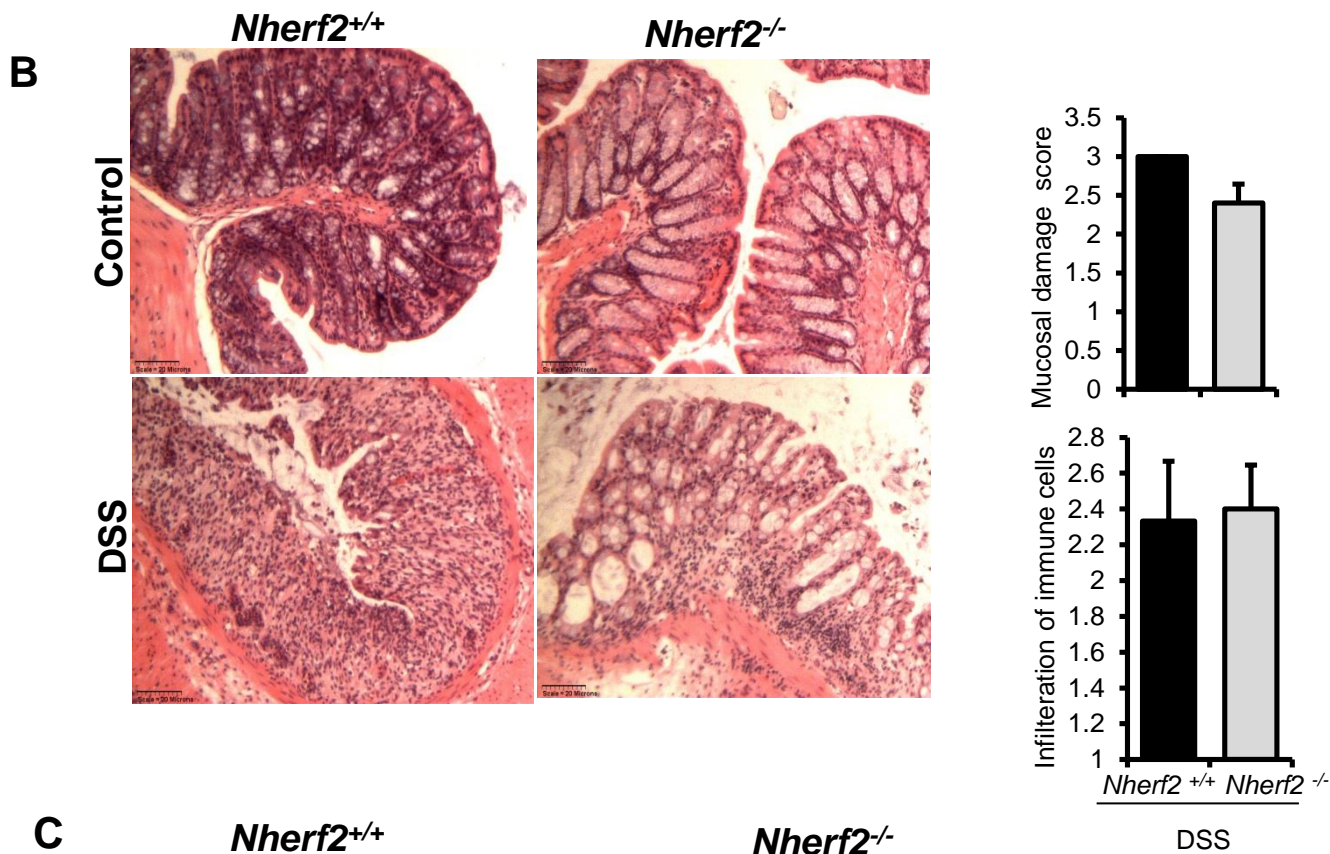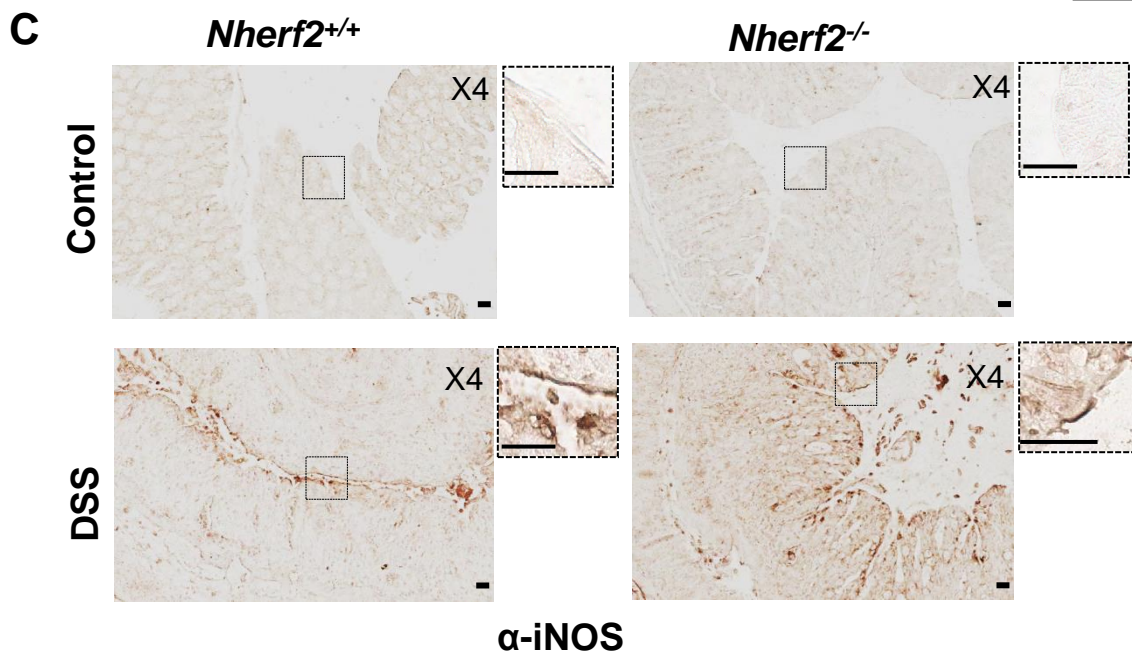

Supplementary figure 2

Supplement: mmc2.pdf [file mmc2.pdf]

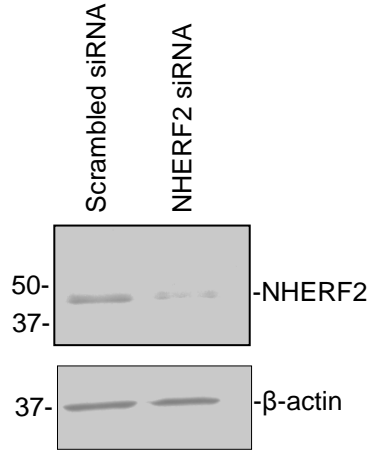

Supplementary figure 3

Supplement: mmc3.pdf [file mmc3.pdf]

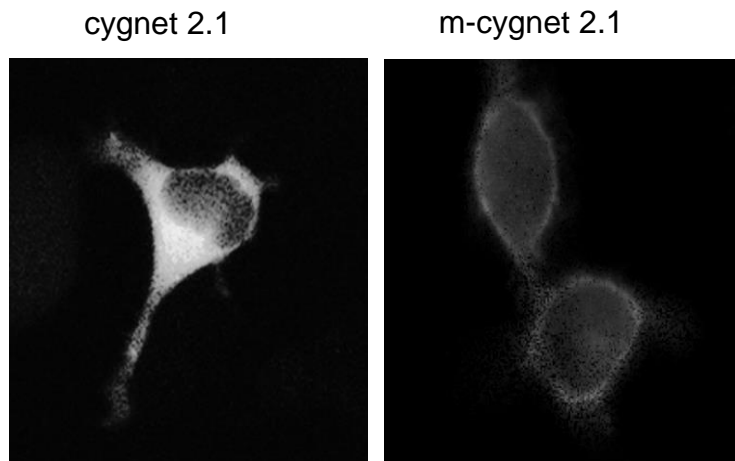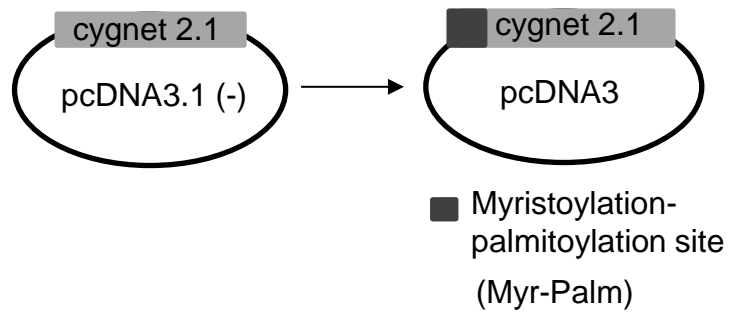

Supplement: mmc5.pdf [file mmc5.pdf]

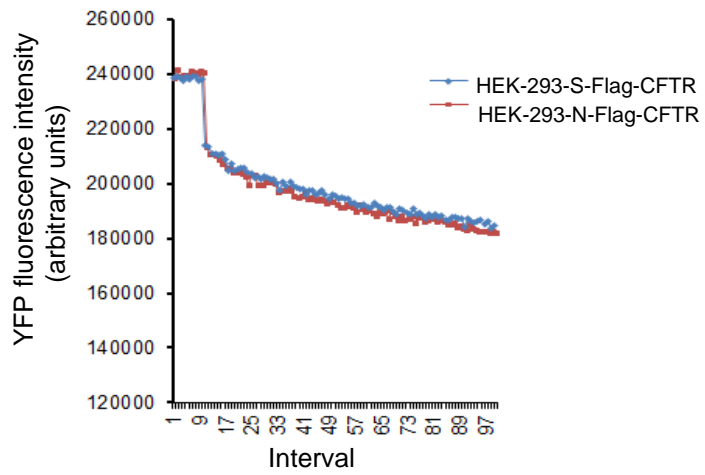

Supplementary figure 6

Supplement: mmc6.pdf [file mmc6.pdf]

**A**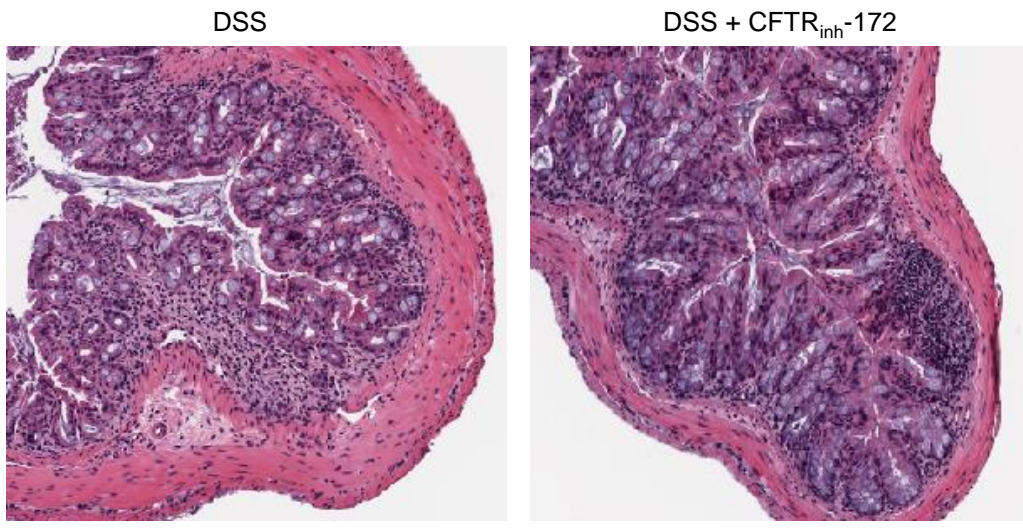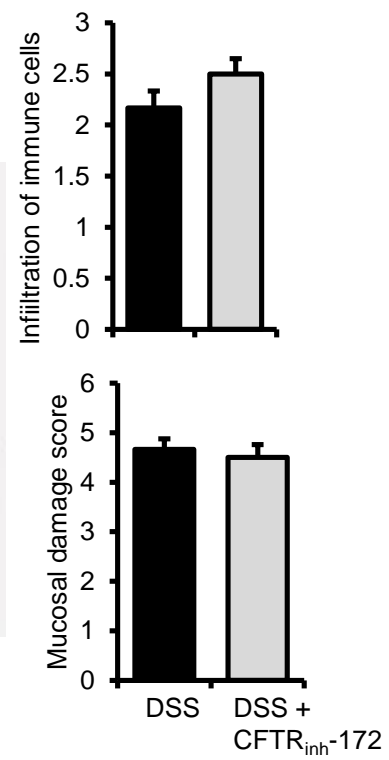**B**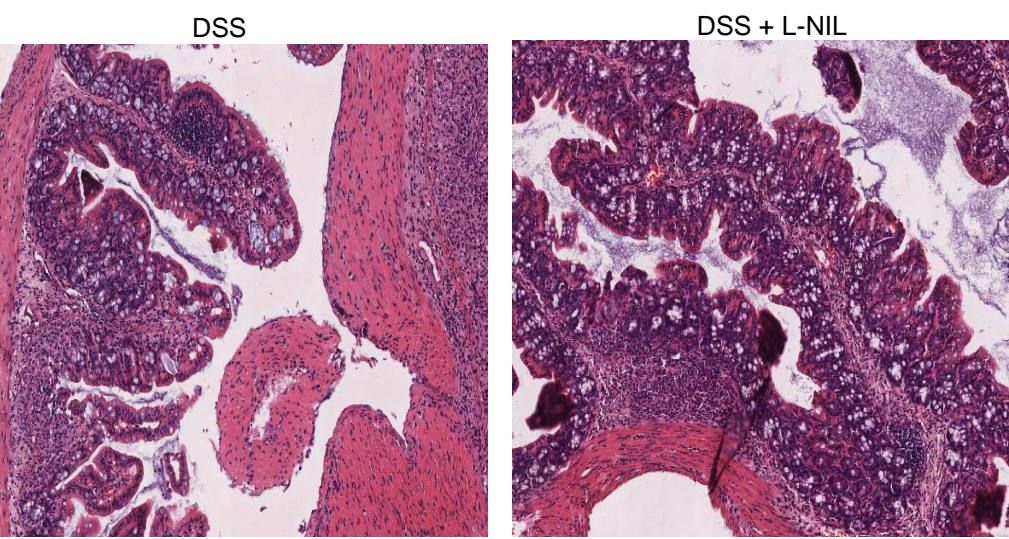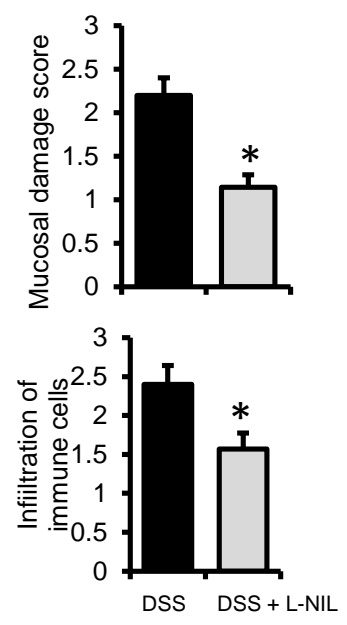**Supplementary figure 7**

Supplement: mmc7.pdf [file mmc7.pdf]

TNBS-*Nherf2*<sup>+/+</sup>

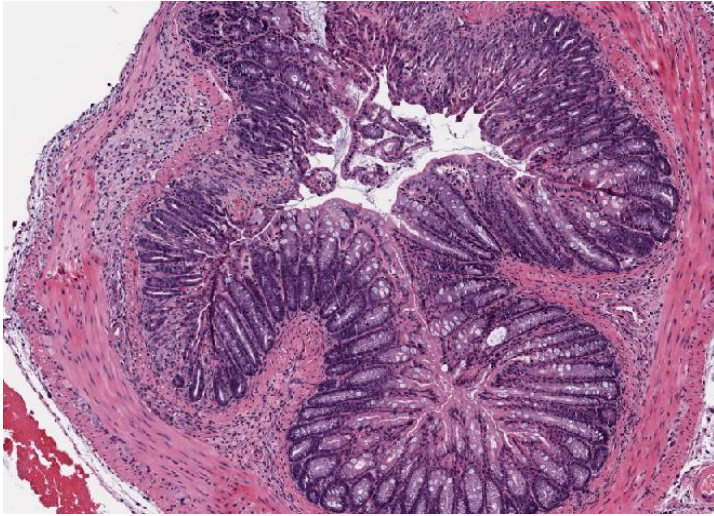

TNBS-*Nherf2*<sup>-/-</sup>

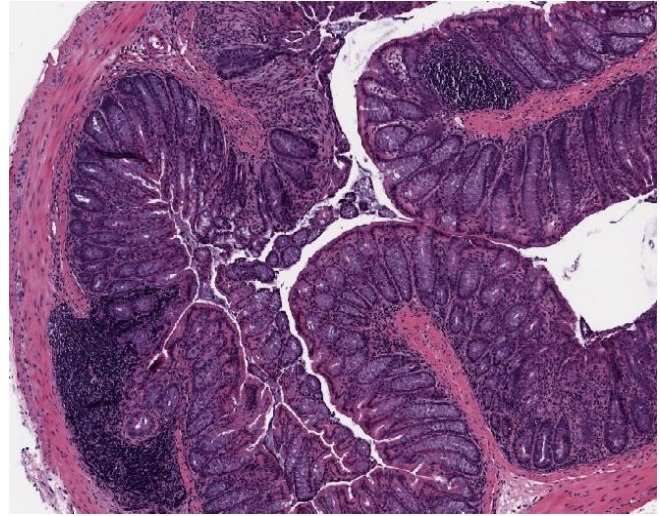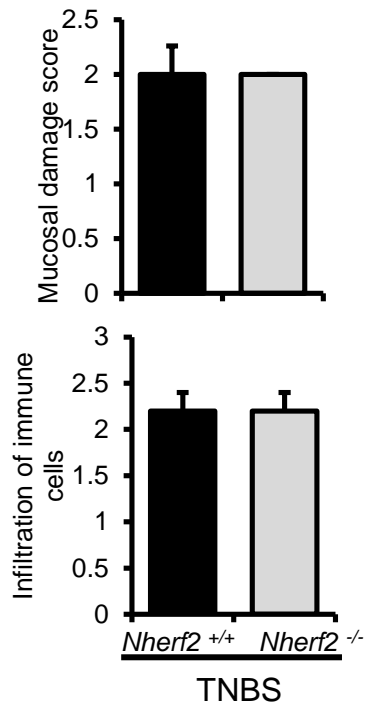

Supplementary figure 8

Supplement: mmc8.pdf [file mmc8.pdf]
